# Supplementary material for: Highly efficient and stable quasi-solid-state quantum dot-sensitized solar cells based on a superabsorbent polyelectrolyte
Source: Royal Society of Chemistry journal article supplement (doi:10.1039/c5ta08209a), 2015-12-23
Supplement: c5ta08209a1.pdf [file c5ta08209a1.pdf]

## Electronic Supplementary Information (ESI)

# Highly efficient and stable quasi-solid-state Quantum dot-sensitized solar cell based on superabsorbent polyelectrolyte

Wenliang Feng, Yan Li\*, Jun Du, Wei Wang and Xinhua Zhong\*

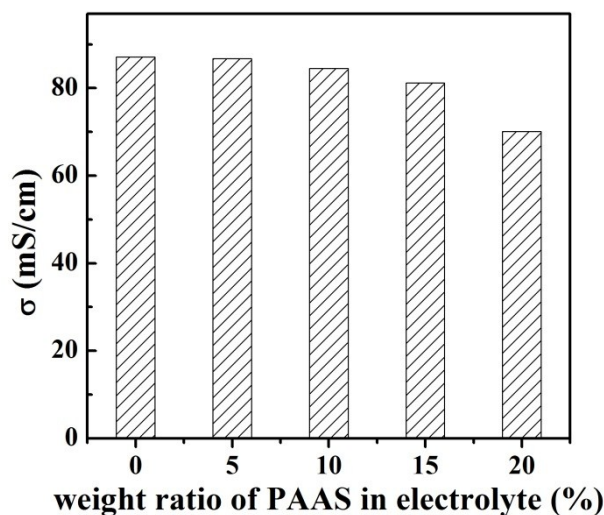

**Fig. S1** Conductivity of electrolytes containing different weight ratio of PAAS with formula weight of 5000000 at 25°C.

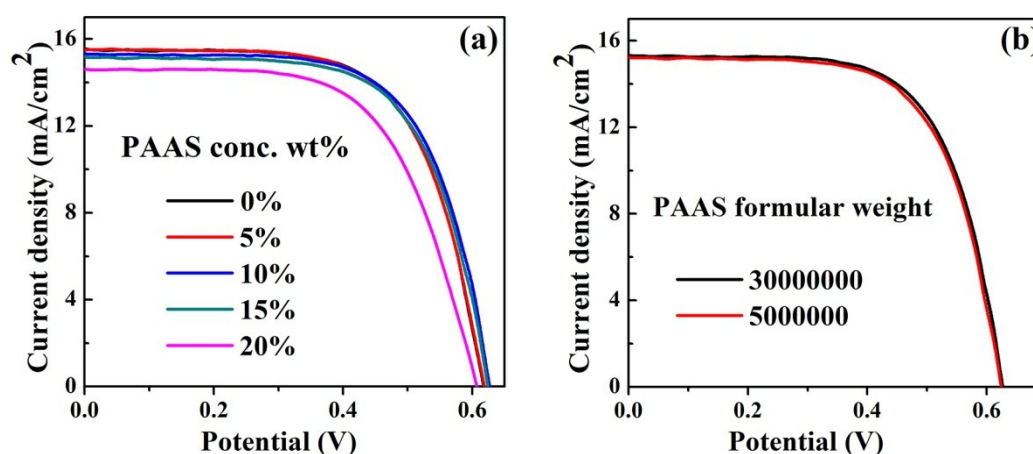

**Fig. S2** (a)  $J$ - $V$  curves of CdSe sensitized solar cells based on polysulfide electrolyte containing different weight ratio of PAAS with formula weight of 3000000. (b)  $J$ - $V$  curves of CdSe QDSCs based on the gel electrolytes with 15 wt% PAAS of 5000000 and 3000000 formula weight.

**Table S1** Photovoltaic parameters of CdSe sensitized solar cells based on the electrolytes containing different weight ratio of PAAS with 30000000 formula weight.

| PAAS (wt%) | $J_{sc}$ (mA·cm <sup>-2</sup> ) | $V_{oc}$ (V) | FF (%)       | PCE (%)          |
|------------|---------------------------------|--------------|--------------|------------------|
| Liquid     | 15.84(15.93)                    | 0.618(0.623) | 65.56(66.01) | 6.42±0.045(6.55) |
| 5%         | 15.81(15.79)                    | 0.621(0.627) | 65.79(66.11) | 6.46±0.031(6.55) |
| 10%        | 15.62(15.79)                    | 0.626(0.626) | 66.31(66.19) | 6.48±0.076(6.54) |
| 15%        | 15.54(15.63)                    | 0.625(0.631) | 66.22(66.27) | 6.43±0.057(6.54) |
| 20%        | 15.05(15.11)                    | 0.609(0.615) | 63.91(64.77) | 5.86±0.086(6.02) |

<sup>a</sup> Average parameters and standard deviation based on 5 solar cells in parallel. The numbers in parentheses represent the values obtained for the champion cells.

**Table S2** Photovoltaic parameters of CdSe QDSCs based on gel electrolytes with 15 wt% PAAS of 5000000 and 30000000 formula weight.

| PAAS (Fw) | $J_{sc}$ (mA·cm <sup>-2</sup> ) | $V_{oc}$ (V) | FF (%)       | PCE (%)          |
|-----------|---------------------------------|--------------|--------------|------------------|
| 30000000  | 15.54(15.63)                    | 0.625(0.631) | 66.22(66.27) | 6.43±0.057(6.54) |
| 5000000   | 15.47(15.71)                    | 0.623(0.629) | 66.41(66.37) | 6.40±0.072(6.56) |

<sup>a</sup> Average parameters and standard deviation based on 5 cells in parallel. The numbers in parentheses represent the values obtained for the champion cells.

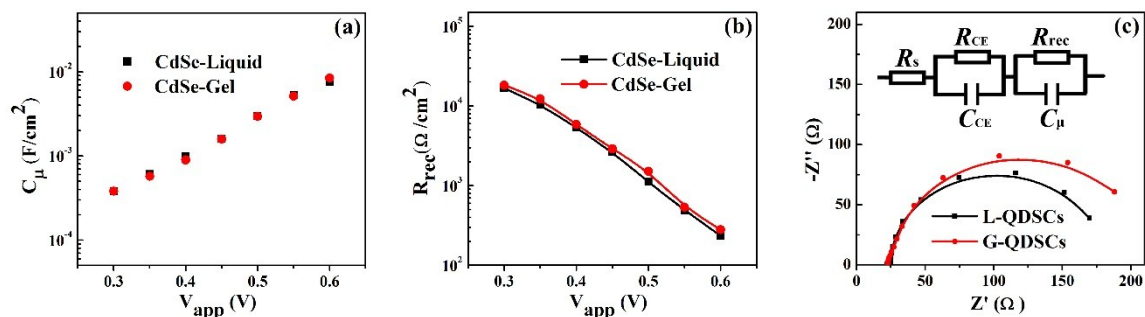

**Fig. S3** EIS of CdSe sensitized L-QDSCs and G-QDSCs: (a) chemical capacitance  $C_{\mu}$ ; (b) recombination resistance  $R_{rec}$ ; (c) Nyquist plots at  $-0.65$  V forward bias (Inset: the equivalent circuit used to fit EIS).

**Table S3** Simulated values of resistance (R) and capacitance (C) under the forward bias of  $-0.6$  V of CdSe sensitized L- and G-QDSCs.

| The cells | $R_s$ ( $\Omega \cdot \text{cm}^2$ ) | $R_{\text{CE}}$ ( $\Omega \cdot \text{cm}^2$ ) | $R_{\text{rec}}$ ( $\Omega \cdot \text{cm}^2$ ) | $C_{\mu}$ ( $\text{mF} \cdot \text{cm}^2$ ) | $\tau_n$ (ms) |
|-----------|--------------------------------------|------------------------------------------------|-------------------------------------------------|---------------------------------------------|---------------|
| L-QDSCs   | 22.85                                | 5.41                                           | 217                                             | 7.6                                         | 1649.2        |
| G-QDSCs   | 22.40                                | 4.89                                           | 234                                             | 8.1                                         | 1895.4        |

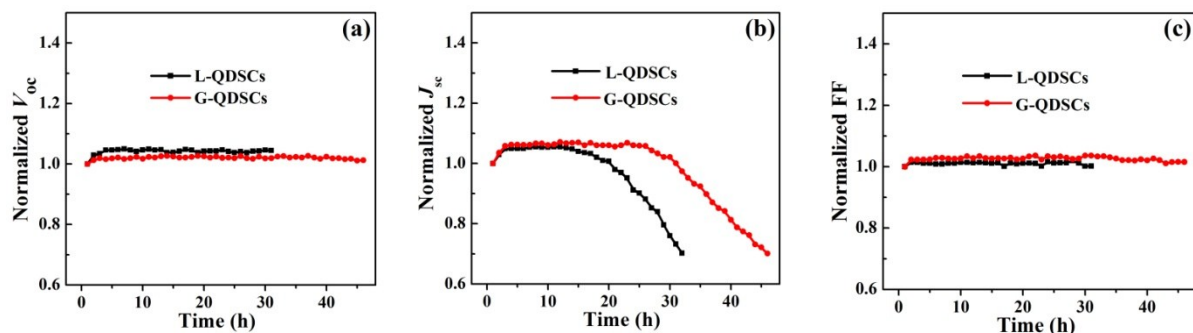

**Fig. S4** Normalized  $V_{\text{oc}}$ ,  $J_{\text{sc}}$  and FF variation of CdSeTe based L- and G-QDSCs under successive irradiation provided by an AM 1.5G solar simulator with intensity of  $100 \text{ mW cm}^{-2}$  at room condition.

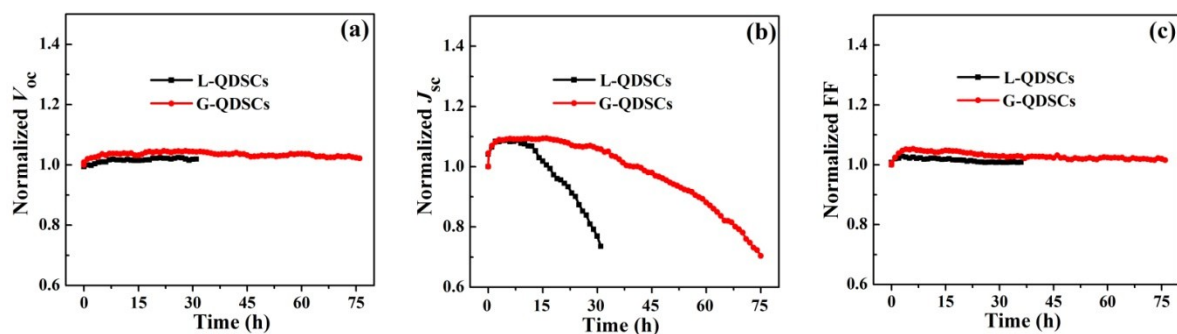

**Fig. S5** Normalized  $V_{\text{oc}}$ ,  $J_{\text{sc}}$  and FF variation of CdSe based L- and G-QDSCs under successive irradiation provided by an AM 1.5G solar simulator with intensity of  $100 \text{ mW cm}^{-2}$  at room condition.
